1 FMT Restores Colonic Protein Biosynthesis and Cell Proliferation in Patients with  
2 Recurrent *Clostridioides difficile* Disease

3

4 G. Brett Moreau<sup>1</sup>, Mary Young<sup>1</sup>, Brian Behm<sup>1</sup>, Mehmet Tanyüksel<sup>1</sup>, Girija  
5 Ramakrishnan<sup>1</sup>, and William A. Petri, Jr.<sup>1,2,3</sup>

6 Departments of Medicine<sup>1</sup>, Microbiology, Immunology and Cancer Biology<sup>2</sup>, and  
7 Pathology<sup>3</sup>, University of Virginia, Charlottesville VA 22908

8

9 **Abstract**

10 Recurrent *C. difficile* infection (CDI) is a major health threat with significant mortality and  
11 financial costs. Fecal Microbiota Transplantation (FMT) is an effective therapy, however  
12 the mechanisms by which it acts, particularly on the host, are poorly understood. Here  
13 we enrolled a prospective cohort of human patients with recurrent CDI (n=16)  
14 undergoing FMT therapy. Colonic biopsies were collected and bulk RNA sequencing  
15 was performed to compare changes in host gene expression pre- and two months post-  
16 FMT. Transcriptional profiles were significantly altered after FMT therapy, with many  
17 differentially expressed genes (~15% of annotated genes detected). Enrichment  
18 analysis determined that these changes were reflective of increased protein production  
19 post-FMT, with enrichment of pathways such as Ribosome Biogenesis, Protein  
20 Processing, and signaling pathways (Myc, mTORc1, E2F) associated with cell  
21 proliferation and protein biosynthesis. Histology of H&E-stained biopsies identified a  
22 significant increase in colonic crypt length post-FMT, suggesting that this treatment  
23 promotes cell proliferation. Crypt length was significantly correlated with enriched Myc

24 and mTOR signaling pathways as well as genes associated with polyamine  
25 biosynthesis, providing a potential mechanism through which this may occur. Finally,  
26 signaling pathways upstream of Myc and mTOR, notably IL-33 Signaling and EGFR  
27 ligands, were significantly upregulated, suggesting that FMT may utilize these signals to  
28 promote cell proliferation and restoration of the intestine.

29

## 30 **Introduction**

31 *Clostridioides difficile* infection (CDI) is a critical public health threat that is associated  
32 with significant morbidity, mortality, and financial costs. Although the CDI-associated  
33 mortality rate in the United States is 2.7% for primary infection, there is a 20%  
34 recurrence rate (1), and mortality is nearly 10 times higher (25.4%) for recurrent disease  
35 (2). While standard of care for CDI remains antibiotic treatment (3, 4), antibiotic  
36 exposure is a significant risk factor for recurrent CDI (5) due to its disruption of the  
37 intestinal microbiota. Because of this, fecal microbiota transplantation (FMT) has  
38 emerged as a major therapeutic option for recurrent CDI. Two FMT therapeutics have  
39 recently been FDA-approved for the treatment of recurrent *C. difficile*: SER-109 (Vowst),  
40 an oral therapeutic utilizing purified *Firmicutes* spores (6) and RBX2660 (Rebyota),  
41 which uses a consortium of live microbes and is delivered via enema (7). As both  
42 products are of limited efficacy, better understanding of the specific mechanisms  
43 underlying FMT offer the promise for improved treatment.

44

45 Our understanding of the mechanisms through which FMT is protective, particularly its  
46 effect on the host, remain incomplete. Because CDI is associated with antibiotics and

47 microbiome disruption (8, 9), much of the work looking at FMT's role in recurrent CDI  
48 has focused its impact on restoration of the intestinal microbiota (10) and resulting  
49 microbial metabolites, such as bile acids (11–13). These results suggest that FMT may  
50 protect against *C. difficile* through niche restriction and competition with the transplanted  
51 microbes (14). However, signaling from the microbiota can also affect intestinal immune  
52 cell development and signaling (15), and it is likely that FMT also initiates changes in  
53 the intestinal epithelium or immune cells that impacts successful protection from  
54 recurrent disease. A role for the immune response in the pathogenesis of primary CDI  
55 has previously been identified, as elevated immune responses and increased  
56 inflammation in response to toxin-mediated tissue damage are associated with worse  
57 clinical outcomes independently of bacterial burden (16–18). In addition, the type of  
58 immune response can have a significant impact on disease progression, as Type 3  
59 immune responses have been associated with exacerbated disease severity (19), while  
60 Type 2 immunity has been associated with tissue repair and protection from severe  
61 disease (20–22). Based on these data, we hypothesized that FMT directly impacts host  
62 responses in the gut to promote protection against recurrent CDI.

63

64 We have recently identified gene expression changes associated with the initial stages  
65 of FMT in a mouse model of antibiotic treatment (23). This study found significant  
66 changes in host immune responses both transcriptionally and in immune cell  
67 populations within one week of FMT administration. FMT was also associated with  
68 upregulation of genes associated with intestinal homeostasis and neuropeptide  
69 signaling, which suggest that FMT can promote restoration of intestinal homeostasis in

70 the absence of prior *C. difficile* exposure. While the effects of FMT on the host have  
71 become better understood, many of these studies have looked in the context of other  
72 inflammatory disorders, such as intestinal colitis (24–26). In addition, data in patient  
73 cohorts is still limited, as most studies have utilized animal models. Many studies with  
74 FMT patients have been limited to the assessment of systemic biomarkers, finding that  
75 FMT can alter inflammatory biomarkers (27, 28) as well as miRNA profiles, which can  
76 impact immune signaling (29). Both immune and colonic transcriptional changes have  
77 previously been characterized by our group in a cohort of patients receiving FMT for  
78 recurrent CDI (30). This study observed increased expression of the Type 2 cytokine IL-  
79 25 along with increased expression of genes promoting intestinal epithelial cell  
80 differentiation and extracellular matrix restoration post-FMT. However, this study was  
81 limited by a small cohort size (n=6) and the confounder of IBS-like symptoms in two  
82 patients in the study.

83

84 The current study aimed to replicate these findings in a larger patient cohort with a more  
85 expansive collection of biological samples, allowing for more thorough characterization  
86 of the biological changes associated with FMT. We utilized bulk RNA sequencing of  
87 colonic biopsies pre- and two months post-FMT to investigate FMT-driven changes in  
88 host transcriptional profiles. Our results suggest that FMT promotes expression of  
89 protein biosynthesis and extracellular matrix remodeling pathways, potentially through  
90 upstream IL-33 and EGFR signaling. These changes may promote increased cell  
91 proliferation within the colon and restoration of intestinal homeostasis.

92

## 93 **Methods**

### 94 **Study Enrollment**

95 Participants in this study were drawn from an ongoing clinical study at the University of  
96 Virginia. This study has been approved by the Institutional Review Board and is  
97 registered under ClinicalTrials.gov ID NCT02797288. Study subjects (aged 18-85) were  
98 recruited from recurrent CDI patients scheduled for FMT therapy through colonoscopy  
99 in the UVA outpatient clinic. Donor FMT material was obtained from a screened stool  
100 bank (OpenBiome, Cambridge, MA). Follow-up collection of biopsies was also  
101 performed approximately two months (mean = 63.2 days) from the date of FMT  
102 administration.

103

### 104 **Biopsy Collection and Preservation**

105 Biopsy samples were collected from the distal colon during the FMT colonoscopy and  
106 by sigmoid colonoscopy at scheduled follow-up. Biopsies were either immediately flash  
107 frozen or stored in Allprotect tissue reagent (Qiagen) and then flash frozen. Frozen  
108 biopsies were then stored at -80°C until analysis. Two biopsies were used at both pre-  
109 and post-FMT timepoints for RNA isolation and subsequent sequencing. Due to a  
110 change in collection protocol, two Allprotect biopsies were used for six patients, while  
111 one AllProtect biopsy and one flash frozen biopsy were used for the other ten  
112 patients. Additional biopsies were formalin-fixed and paraffin-embedded (FFPE) for  
113 Hematoxylin and Eosin (H&E) staining and tissue visualization.

114

### 115 **Bulk RNA Sequencing and Bioinformatics**

116 Biopsies stored for RNA sequencing as described above were first transferred to clean  
117 2ml screw-cap tubes containing a sterile 5mm stainless steel bead, then homogenized  
118 using a TissueLyser II (Qiagen) for 3 minutes at 25Hz. Homogenized tissue was  
119 vortexed and then RNA isolated using the RNeasy kit (Qiagen) according to the  
120 manufacturer's protocol. RNA yield and quality was evaluated using a TapeStation  
121 (Agilent), then stored at -80°C until use. Purified total RNA was submitted to Novogene  
122 for bulk RNA sequencing. Libraries were generated after Poly(A) enrichment for mRNA  
123 transcripts, followed by paired-end 150 base pair sequencing using a NovaSeq X Plus  
124 series sequencer (Illumina).

125

126 Prior to analysis, unprocessed sequencing reads were evaluated for quality using  
127 FastQC (31) and MultiQC (32), trimmed to remove adapter sequences using BBTools,  
128 and pseudomapped to the human genome using Kallisto (33). The resulting count  
129 tables were imported into R (34) using TxImport (35) and the DESeq2 package (36) was  
130 used to exclude genes with low counts, normalize data, estimate dispersions, and fit  
131 counts using a negative binomial model. Differential gene expression was determined  
132 based on this multivariate model.

133

134 Gene Set Enrichment Analysis (GSEA) was performed using the fgsea package (37) in  
135 R. Briefly, all genes included in the data set were ranked from most upregulated to most  
136 downregulated post-FMT according to their Wald statistic from the multivariate model.  
137 This ranked list was used for GSEA using the Hallmark (38), Gene Ontology (39), or

138 Kyoto Encyclopedia of Genes and Genomes (40) data sets. The tidyverse package (41)  
139 was used for data organization and visualization.

140

## 141 **Histology and Crypt Length Measurement**

142 Slides containing FFPE biopsy sections were stained with H&E and imaged for crypt  
143 length quantification. At least three crypts from two different regions were selected from  
144 each slide. Crypt lengths were calculated using Sedeen slide viewer software  
145 (Pathcore). Researchers were blinded to the FMT status of each slide at the time of  
146 histopathologic analysis. After collection of all scores, means and standard deviations  
147 were calculated on a per-slide and per-patient basis at both pre-FMT and post-FMT  
148 timepoints. Statistics were performed on per-patient average pre- and post-FMT crypt  
149 lengths using a linear mixed effects model that incorporated patient ID to control for  
150 within-patient variability.

151

## 152 **Results and Discussion**

### 153 **Patient Characteristics**

154 A total of 16 patients with recurrent CDI undergoing FMT therapy provided colonic  
155 biopsy samples at both FMT and follow-up appointments. The clinical characteristics of  
156 this cohort are summarized in Table 1. Patients in the cohort were majority female and  
157 entirely white. While 94% of patients had at least 3 recurrences prior to FMT (mean =  
158 3.8), FMT therapy was successful in all patients as defined by no recurrences within the  
159 follow-up window. All patients were treated with vancomycin prior to FMT treatment  
160 (standard of care at UVA hospital), and no patients used antibiotics during the follow-up

161 period post-FMT. IBD was not a major confounder of this study, as only one patient had  
162 an IBD diagnosis in this cohort.

163

### 164 **FMT Promotes Broad Changes in Intestine Transcriptional Profiles**

165 To evaluate the effect of FMT on host gene expression, bulk RNA sequencing  
166 (RNAseq) was performed on biopsies collected immediately pre-FMT and at two month  
167 follow-up. Reads from bulk RNAseq were processed to preserve only high quality reads  
168 (>Q30, indicating 99.9% base calling accuracy) and remove adapter content. After this,  
169 the clean reads were pseudomapped to the human genome using Kallisto, with 80% of  
170 these reads successfully mapped and used for downstream analysis. Differentially  
171 Expressed Genes (DEGs) were calculated using a negative binomial multivariate model  
172 that incorporated patient ID number to account for within-patient variability. A total of  
173 1,877 genes were significantly upregulated post-FMT (adjusted p value < 0.05), while  
174 1,788 were downregulated (Fig. 1A). The 3,665 total DEGs represented approximately  
175 15% of annotated genes included in the analysis. Of these differentially expressed  
176 genes, 154 (8.2%) and 182 (10.2%) genes had at least a two-fold increase or decrease  
177 in gene expression, respectively. Together, these results indicate that FMT promotes  
178 large changes in gene expression that persist out to two month follow-up.

179

180 The 50 most differentially expressed genes between timepoints are presented in Figure  
181 1B. Hierarchical clustering was performed with these data and samples clustered  
182 primarily according to FMT status. The most prominent gene significantly increased  
183 post-FMT was *FOSL1*, a FOS family protein that heterodimerizes to form the



184 transcription factor AP-1 (42). *FOSL1* is upregulated in cancer cells in a kRAS-  
185 dependent manner (43) and is associated with increased stemness in cancer cells,  
186 potentially through mutual regulation with NF-kB (44). Other significantly increased  
187 genes included genes associated with extracellular matrix remodeling, such as *MMP1*  
188 and *SERPINB5*. These genes have been implicated as markers of epithelial-  
189 mesenchymal transition and poor prognosis in colorectal cancer samples (45).  
190 Downregulated genes include genes such as *SLC6A19*, *KCNG1*, *ENPP1*, *NDRG1*, and  
191 *PLOD2*. *SLC6A19* is a neutral amino acid transporter that is strongly repressed in stem  
192 cells via *SOX9* (46), and loss of this gene is associated with protein restriction and  
193 decreased mTORc1 activity (47). *ENPP1* is an extracellular cGAMP hydrolase, and its  
194 activity is associated with degradation of immunomodulatory signaling and less efficient  
195 inhibition of cancer growth and metastasis (48). Overall, these results point to a more  
196 proliferative environment post-FMT.

197

198 These findings were broadly consistent with findings from our previous cohort: 51.6% of  
199 differentially expressed genes in Jan *et al* were also significantly altered in this data set.  
200 This includes several of the most differentially expressed genes from Figure 1B, such as  
201 *MMP1*, *SERPINB5*, and *SLC6A19*.

202

### 203 **Pathway Analysis with RNAseq Data**

204 We aimed to take a more systematic approach to identifying biological pathways that  
205 were altered by FMT. To do this, RNA sequencing data were analyzed using Gene Set  
206 Enrichment Analysis (GSEA) to identify potential functions that were enriched pre- or

207 post-FMT. Three different databases were used for this analysis: Hallmark, Gene  
208 Ontology: Biological Processes (GO:BP) and Kyoto Encyclopedia of Genes and  
209 Genomes (KEGG). We took this approach to increase our coverage of biological  
210 pathways, as each database contains slightly different gene sets and together they  
211 provide a more comprehensive view of pathways whose expression may be modified by  
212 FMT. The top five enriched gene sets for each database in both upregulated and  
213 downregulated post-FMT conditions are presented in Figure 2, while all gene sets are  
214 presented in Supplementary Table 1.

215

216 The most prominently upregulated process in post-FMT biopsy samples was ribosomal  
217 biogenesis and protein processing (Fig. 2A). Ribosome and protein synthesis gene sets  
218 were significantly enriched post-FMT in both GO:BP and KEGG databases, making up  
219 most of the top 5 enriched gene sets. Analysis of leading edge genes (those driving  
220 enrichment of each gene set in GSEA) found that GO:BP gene sets were primarily  
221 driven by the same core set of genes. These genes were primarily regulators of  
222 ribosome biogenesis and maturation (*RRP15*, *RRS1*, *BYSL*, *UTP11*, *MAK16*) or nuclear  
223 proteins (*NUP88*, *NOP16*), many of which have been implicated in cell proliferation in  
224 models of cancer (49–51). Ribosome biosynthesis, a process that starts in the nucleus  
225 and continues in the cytoplasm, is a critical process required for the level of protein  
226 production necessary for cell proliferation (52, 53). GSEA using KEGG gene sets also  
227 identified Ribosomes as the most strongly enriched gene set along with other gene sets  
228 associated with gene expression (Spliceosome, RNA Polymerase) and subsequent

229 protein processing (Protein Export, Proteasome). This highlights the high level of  
230 metabolic activity post-FMT through the synthesis of new proteins.

231  
232 Hallmark gene sets exhibited slightly different gene sets. The most enriched gene sets  
233 from this database were downstream targets of several signal transduction molecules,  
234 including Myc, mTORc1, and E2F. Myc and mTORc1 are major regulators of ribosomal  
235 biogenesis and subsequent protein synthesis (54, 55), and many of the genes observed  
236 in these gene sets are indicative of these processes. The Unfolded Protein Response  
237 was also upregulated post-FMT, including genes such as *HYOU1*, *HSPA4*, and *BAG3*,  
238 which are associated with response to misfolded protein stress that may result from  
239 increased protein synthesis. Similarly, Proteasome genes were also enriched in the  
240 KEGG database and are likely a response to increased protein synthesis and turnover.  
241 Proteasome machinery is critical for proper cell proliferation, and proteasome inhibitors  
242 are a clinically approved therapy for several cancers (56).

243  
244 Several gene sets were downregulated post-FMT (Fig. 2B). The most prominent  
245 downregulated signature was fatty acid catabolism, which was prominent in the Top 5  
246 most enriched gene sets for both GO:BP and KEGG databases. This was driven by  
247 enzymes in the fatty acid beta-oxidation pathway, including *ACOX1*, *ACAA2*, *ADH1C*,  
248 and *ACSL5*. Bile acid metabolism was also significantly decreased post-FMT. These  
249 changes in lipid metabolism, namely downregulation of fatty acid and bile acid  
250 metabolism pathways, were also observed post-FMT in our previous study investigating  
251 a mouse model of FMT treatment (57). The microbiota play a significant role in both lipid

252 metabolism (58) and insulin sensitivity (59), so these transcriptional changes may be  
253 due to differences in host metabolism and energy production driven by differences in  
254 microbial metabolism of the diet. Indeed, host energy metabolism pathways Glycolysis  
255 and Oxidative Phosphorylation were both significantly enriched post-FMT  
256 (Supplementary Table 1), suggesting that a shift from Glycolysis to fatty acid beta-  
257 oxidation may occur in the absence of the microbiome. Bile acids also play a major role  
258 in lipid absorption through fat emulsification and solubilization (60). The intestinal  
259 microbiota are capable of modifying these bile acids and antibiotic treatment disrupts  
260 this process, altering intestinal bile acid composition (61).

261

262 IFN $\alpha$  and IFN $\gamma$  signaling were also decreased post-FMT, and these pathways were  
263 primarily driven by a core set of interferon-stimulated (*IFIT1*, *IFIT2*, *GZMA*) and  
264 apoptosis-associated (*CASP7*, *CASP3*) genes. Gene sets associated with Bile Acid  
265 Metabolism, Fatty Acid Metabolism, and IFN $\alpha$  and IFN $\gamma$  Responses were all enriched  
266 in antibiotic-treated mice compared to naive controls (62), indicating that these  
267 transcriptional changes are likely due to antibiotic-mediated disruption of the intestinal  
268 microbiota. Finally, genes that were downregulated by kRAS signaling were also  
269 downregulated post-FMT, which is consistent with the upregulation of *FOSL1*, a kRAS-  
270 upregulated gene (43), observed in Figure 1B. kRAS is a small GTPase that plays a key  
271 role in maintenance of intestinal homeostasis. It is activated by many extracellular  
272 stimuli, including EGFR signaling, and is able to transduce those signals through  
273 activation of downstream signaling pathways such as Raf/Erk and PI3K/Akt/mTOR to

274 promote cell proliferation or intestinal renewal (63). This served as additional evidence  
275 that FMT promotes signaling pathways that promote cell proliferation.

276

277 **FMT is associated with Colonic Crypt Elongation that Correlates with Myc and**  
278 **mTORc1 Target Gene Expression**

279 Because we observed enrichment of gene sets associated with increased metabolic  
280 activity (Ribosome Biogenesis, Protein Export, Myc and mTORc1 Signaling), we  
281 hypothesized that the epithelium would experience significant proliferation post-FMT. To  
282 test this, we measured crypt length in H&E stained colonic biopsies, as crypt elongation  
283 has been associated with elevation of cell proliferation markers such as Ki67 or LGR5  
284 (64, 65). Crypt length was measured from multiple slides per patient at each timepoint in  
285 a blinded fashion. Statistical differences were determined by comparing the average  
286 crypt length pre- and post-FMT in a linear model controlling for within-patient variability.  
287 Average crypt length was significantly longer in patients post-FMT (Fig. 3A-B),  
288 suggesting that FMT stimulated epithelial cell proliferation. Of note, CDI was previously  
289 associated in a mouse study with elongated crypt length, with FMT paradoxically  
290 restoring colonic crypts to a shorter length more similar to uninfected mice (66). This  
291 finding was in the context of acute infection with *C. difficile* and the resulting  
292 inflammatory immune response, which was already promoting increased crypt length.  
293 This is consistent with other infections where crypt elongation has been observed, such  
294 as *Salmonella* Typhimurium (67) and HIV (68). Broad inflammatory signaling was  
295 largely absent from our RNA sequencing data, consistent with our earlier finding that  
296 FMT promotes Type 2 immunity in humans (30). We hypothesize that this anti-

297 inflammatory colonic environment likely contributes to the differential effects of FMT on  
298 crypt length.

299

300 One of the strongest signatures from the RNAseq data was Myc target genes. Because  
301 these signaling pathways are known to promote ribosome biogenesis, protein  
302 production, and cell proliferation, we hypothesized that crypt length would correlate with  
303 the expression of target genes in these pathways. To test this, expression of the top 10  
304 leading edge genes for both Myc and mTORc1 Target Genes were tested for correlation  
305 with crypt length from both pre- and post-FMT samples. Overall, 6/10 Myc Target genes  
306 and 4/10 mTORc1 Target leading edge genes were significantly correlated with crypt  
307 length, and all trended towards a positive correlation (Fig. 4A), indicating that these  
308 pathways are associated with increased crypt cell proliferation. Previous work has  
309 shown the Myc is required for proliferation of crypt progenitor cells, as crypts in which  
310 Myc has been knocked out are quickly lost and replaced by Myc-sufficient crypts (69).  
311 These Myc-deficient crypts were associated with fewer cell numbers per crypt, smaller  
312 cell sizes, and reduced biosynthetic activity compared to Myc-sufficient crypts. The most  
313 differentially expressed Myc target gene in our data set was *ODC1*, the rate limiting  
314 enzyme for polyamine biosynthesis. *SRM*, another polyamine biosynthesis gene, was  
315 also a Myc Target gene, further implicating this pathway. Polyamine biosynthesis  
316 genes, including *ODC1*, have been implicated in ribosome homeostasis, as depletion of  
317 these genes was associated with impaired biogenesis (70). Polyamines are also  
318 important sources of energy for enterocytes, making them critical for epithelial renewal  
319 and proper barrier function in the gut (71), which supports their potential role in cell

320 proliferation. Both *ODC1* and *SRM* expression were significantly correlated with colonic  
321 crypt length (Fig. 4B-C), suggesting that polyamine biosynthesis and utilization may be  
322 one potential mechanism by which crypt elongation occurs. Overall, these results  
323 provide additional evidence that FMT treatment promotes cell proliferation in the  
324 intestinal epithelium.

325

### 326 **IL-33 and EGFR Signaling Ligands Are Upregulated Post-FMT**

327 Based on the enrichment in Myc and mTORc1 target genes post-FMT and their  
328 association with increased protein production and changes in crypt length, we were  
329 interested in determining potential upstream mechanisms of action. mTORc1 and E2F  
330 signaling cascades can both be stimulated by EGFR signaling through PI3K/Akt and  
331 Ras/Raf/Erk signaling cascades, respectively (72). In addition, Ras/Raf/Erk and  
332 PI3K/Akt signaling can significantly increase the half-life of Myc protein and thus  
333 enhance its effects on transcription (73). Based on these data, we hypothesized that  
334 EGFR signaling may be partially responsible the significant increase in Myc, mTORc1,  
335 and E2F target genes observed in our GSEA. We observed that several ligands of  
336 EGFR were significantly upregulated post-FMT, including amphiregulin (*AREG*),  
337 epiregulin (*EREG*) and heparin-binding EGF-like growth factor (*HB-EGF*) (Fig. 5A).

338

339 Previous studies in our group have identified Type 2 immune responses in both animal  
340 models of FMT and human patients (23, 30). Innate Lymphoid Cell 2s (ILC2s), which  
341 are critical for the intestinal Type 2 immune response, are responsive to signals from  
342 the microbiome (74). Our group has recently observed that antibiotic treatment

343 significantly decreased ILC2 populations, while IL-33 treatment restored these  
344 populations (75). ILC2s robustly produced AREG in response to IL-33 treatment, and  
345 this was protective against acute CDI. Based on these data, we hypothesized that Type  
346 2 immunity, particularly IL-33 signaling, may be upregulated post-FMT. We observed  
347 that IL-33 signaling was differentially expressed, with transcripts of both the cytokine  
348 (*IL33*) and receptor (*IL1RL1/ST2*) significantly increased post-FMT (Fig. 5B). ILC2-  
349 derived AREG can signal through EGFR to promote intestinal tissue repair, and  
350 disruption of this signaling is associated with inflammatory bowel disease in both animal  
351 and human models (76). In addition, HB-EGF signaling through EGFR can feed back on  
352 this process to increase IL-33 expression, and this upregulation is required for wound  
353 repair in HB-EGF treated keratinocytes (77). IL-33/ST2 Signaling and resulting  
354 production of AREG and other EGFR ligands may therefore promote cell proliferation  
355 and intestinal repair observed post-FMT.

356

357 IL-33 signaling has been shown to promote expression of several matrix  
358 metalloproteinases (MMPs) (78), which may be one mechanism by which FMT  
359 promotes tissue remodeling and restoration of homeostasis. We identified extracellular  
360 matrix remodeling genes (*MMP1*, *SERPINB5*) as some of the most highly upregulated  
361 genes post-FMT (Fig. 1B). Consistent with this, we also found that the gene set for  
362 epithelial-mesenchymal transition (EMT), which is associated with tissue repair and  
363 regeneration, was significantly enriched post-FMT by GSEA (Supplementary Table 1).  
364 EMT is characterized by the transition of polarized epithelial cells to mesenchymal cells  
365 with increased cell mobility and increased production of extracellular matrix proteins. As



366 part of this process, these cells also upregulate MMPs, which can remodel the  
367 extracellular matrix, along with MMP inhibitors such as tissue inhibitors of  
368 metalloproteases (TIMPs) or serine protease inhibitors (SERPINs) (79). Further  
369 targeted analysis of differentially expressed genes identified several MMPs that were  
370 significantly increased post-FMT (Fig. 5C) as well as inhibitors of this process (*TIMP1*,  
371 *SERPINB5*). MMP regulation can be induced by several signaling cascades, including  
372 NF- $\kappa$ B and MAPK pathways as well as AP-1 binding to MMP promoter regions (80), all  
373 pathways that have been implicated in our data. Furthermore, knockdown of MMP1  
374 using shRNA resulted in decreased EMT and decreased Akt and Myc expression in a  
375 colorectal cancer cell line (81), suggesting that expression of these genes may sustain  
376 activation of these pathways. Overall, these results are consistent with an environment  
377 associated with intestinal regeneration and repair.

378

## 379 **Conclusions**

380 A potential model of how the pathways implicated by our transcriptional data may  
381 contribute to changes in crypt length and intestinal repair is presented in Figure 6. We  
382 observed that post-FMT colonic biopsies exhibit longer crypt length than those pre-FMT,  
383 suggesting that FMT promotes cell proliferation. Utilizing bulk RNA sequencing of these  
384 biopsy samples, we observed distinct expression profiles between conditions with many  
385 differentially expressed genes, particularly in pathways associated with protein  
386 synthesis and processing as well as extracellular matrix reorganization. Target genes in  
387 the Myc and mTORc1 pathways were significantly correlated with crypt length in these  
388 patients, including genes associated with polyamine biosynthesis, an important pathway

389 for energy production in enterocytes. We also observed significant changes in IL-33  
390 signaling and EGFR ligand genes, suggesting that IL-33 signaling and resulting  
391 production of EGFR ligands may underlie these changes.

392

393 Further research is necessary to confirm the mechanistic links between these pathways  
394 and the changes in cell proliferation and crypt length observed in our histological data.  
395 However, these data suggest that FMT promotes regeneration of the intestine within a  
396 cohort of patients with recurrent CDI, and that this is associated with broad  
397 transcriptional changes in pathways such as Myc, mTOR, IL-33, and EGFR signaling.

398

#### 399 **Acknowledgements**

400 We would like to thank the subjects in the FMT clinical trial for their cooperation and  
401 participation in this study. This work was supported by NIH grants R01 AI152477 and  
402 R01 AI124214 and the Henske Family. We are indebted to Drs. Jashim Uddin, Farha  
403 Naz, Mayuresh Abhyankar and Chelsea Marie for excellent discussion and review of  
404 this manuscript.

405

#### 406 **Conflicts of Interest**

407 WAP is a consultant for TechLab, Inc. that produces diagnostics for *C. difficile*. The  
408 other authors report no conflicts of interest.

409

410 **Figure 1: FMT drives changes in host transcriptional profiles.** Colonic biopsy  
411 samples were collected immediately pre-FMT or at two month follow-up post-FMT and

412 used to evaluate host transcriptional profiles using bulk RNA sequencing. A) Volcano  
413 plot showing differentially expressed genes (DEGs) that are increased (blue) or  
414 decreased (red) in patients post-FMT compared to baseline. B) Heatmap of 50 most  
415 differentially expressed genes between pre- and post-FMT biopsy samples.

416

417 **Figure 2: Gene sets associated with ribosome/protein synthesis and lipid**  
418 **metabolism are altered by FMT.** Ranked barplot of the most significantly increased (A)  
419 or decreased (B) gene sets post-FMT as determined by Gene Set Enrichment Analysis  
420 (GSEA). Top five gene sets are shown for the Hallmark (red), Gene Ontology: Biological  
421 Processes (green) and KEGG (blue) databases. Genes are ranked according to  
422 Normalized Enrichment Score.

423

424 **Figure 3: FMT promotes increased colonic crypt length.** A) Representative H&E  
425 images of crypts from colonic biopsies from the same patient pre- and post-FMT. B)  
426 Quantification of average crypt length across all patients. Each dot represents a single  
427 patient and gray lines connect paired samples. Statistics were calculated using a linear  
428 mixed effects model controlling for within-patient variability. \*\*\*,  $p < 0.001$

429

430 **Figure 4: Crypt length is correlated with Myc and mTORc1 target genes.** A)  
431 Heatmap showing the Pearson correlation R value for the top 10 leading edge genes  
432 driving enrichment of Myc and mTORc1 Target gene sets in GSEA. Significantly  
433 correlated genes are indicated with asterisks. B-C) Correlation plots showing correlation

434 between average crypt length and normalized gene counts for *ODC1* (B) or *SRM* (C),  
435 rate limiting genes for polyamine biosynthesis. \*,  $p < 0.05$ ; \*\*,  $p < 0.01$

436

437 **Figure 5: FMT promotes expression of IL-33 signaling, EGFR ligand, and tissue**

438 **remodeling genes.** Normalized gene counts of select A) EGFR ligand, B) IL-33

439 signaling, and C) tissue remodeling genes either pre-FMT (red) or post-FMT (blue).

440 Statistics are derived from the DESeq2 multivariate model, which adjusts for multiple

441 comparisons. \*,  $p < 0.05$ ; \*\*,  $p < 0.01$ , \*\*\*,  $p < 0.001$ ; \*\*\*\*,  $p < 0.0001$

442

443 **Figure 6: Visual summary of FMT-promoted changes in colonic gene expression.**

444 FMT is associated with significant increases in IL-33 signaling genes. IL-33 signaling

445 promotes expression of EGFR ligands, including amphiregulin, which can stimulate

446 Erk/MAPK and PI3K/Akt/mTOR signaling cascades. Erk and mTOR also stabilize Myc

447 protein levels, promoting enhanced expression of Myc-activated genes. Myc and

448 mTORc1 target genes promote ribosome biogenesis, protein synthesis and processing,

449 and biosynthesis of polyamines, which promote proliferation of intestinal epithelial cells.

450 Meanwhile, Erk signaling activates c-Fos, a component of the AP-1 transcription factor

451 that increases matrix metalloprotease expression and promotes remodeling and repair

452 of the extracellular matrix.

453

## 454 **References**

- 455 1. Finn E, Andersson FL, Madin-Warburton M. 2021. Burden of *Clostridioides*  
456 *difficile* infection (CDI) - a systematic review of the epidemiology of primary and

- 457 recurrent CDI. BMC Infect Dis 21:456.
- 458 2. Feuerstadt P, Nelson WW, Drozd EM, Dreyfus J, Dahdal DN, Wong AC,  
459 Mohammadi I, Teigland C, Amin A. 2022. Mortality, Health Care Use, and Costs  
460 of Clostridioides difficile Infections in Older Adults. J Am Med Dir Assoc 23:1721-  
461 1728.e19.
- 462 3. McDonald LC, Gerding DN, Johnson S, Bakken JS, Carroll KC, Coffin SE,  
463 Dubberke ER, Garey KW, Gould C V, Kelly C, Loo V, Shaklee Sammons J,  
464 Sandora TJ, Wilcox MH. 2018. Clinical Practice Guidelines for Clostridium difficile  
465 Infection in Adults and Children: 2017 Update by the Infectious Diseases Society  
466 of America (IDSA) and Society for Healthcare Epidemiology of America (SHEA).  
467 Clin Infect Dis 66:e1–e48.
- 468 4. Singh T, Bedi P, Bumrah K, Singh J, Rai M, Seelam S. 2019. Updates in  
469 Treatment of Recurrent Clostridium difficile Infection. J Clin Med Res Vol 11, No  
470 7, Jul 2019.
- 471 5. Madden GR, Boone RH, Lee E, Sifri CD, Petri Jr. WA. 2024. Predicting  
472 Clostridioides difficile infection outcomes with explainable machine  
473 learning. eBioMedicine 106.
- 474 6. Feuerstadt P, Louie TJ, Lashner B, Wang EEL, Diao L, Bryant JA, Sims M, Kraft  
475 CS, Cohen SH, Berenson CS. 2022. SER-109, an oral microbiome therapy for  
476 recurrent Clostridioides difficile infection. N Engl J Med 386:220–229.
- 477 7. Dubberke ER, Orenstein R, Khanna S, Guthmueller B, Lee C. 2023. Final results  
478 from a phase 2b randomized, placebo-controlled clinical trial of RBX2660: a  
479 microbiota-based drug for the prevention of recurrent Clostridioides difficile

- 480 infection. *Infect Dis Ther* 12:703–709.
- 481 8. Slimings C, Riley T V. 2014. Antibiotics and hospital-acquired *Clostridium difficile*  
482 infection: update of systematic review and meta-analysis. *J Antimicrob*  
483 *Chemother* 69:881–891.
- 484 9. Deshpande A, Pasupuleti V, Thota P, Pant C, Rolston DDK, Sferra TJ,  
485 Hernandez A V, Donskey CJ. 2013. Community-associated *Clostridium difficile*  
486 infection and antibiotics: a meta-analysis. *J Antimicrob Chemother* 68:1951–  
487 1961.
- 488 10. Gotoh K, Sakaguchi Y, Kato H, Osaki H, Jodai Y, Wakuda M, Také A, Hayashi S,  
489 Morita E, Sugie T, Ito Y, Ohmiya N. 2022. Fecal microbiota transplantation as  
490 therapy for recurrent *Clostridioides difficile* infection is associated with  
491 amelioration of delirium and accompanied by changes in fecal microbiota and the  
492 metabolome. *Anaerobe* 73:102502.
- 493 11. Weingarden AR, Chen C, Bobr A, Yao D, Lu Y, Nelson VM, Sadowsky MJ,  
494 Khoruts A. 2014. Microbiota transplantation restores normal fecal bile acid  
495 composition in recurrent *Clostridium difficile* infection. *Am J Physiol Gastrointest*  
496 *Liver Physiol* 2013/11/27. 306:G310–G319.
- 497 12. Brown JR-M, Flemer B, Joyce SA, Zulquernain A, Sheehan D, Shanahan F,  
498 O'Toole PW. 2018. Changes in microbiota composition, bile and fatty acid  
499 metabolism, in successful faecal microbiota transplantation for *Clostridioides*  
500 *difficile* infection. *BMC Gastroenterol* 18:131.
- 501 13. Foley MH, Walker ME, Stewart AK, O'Flaherty S, Gentry EC, Patel S, Beaty V V,  
502 Allen G, Pan M, Simpson JB, Perkins C, Vanhoy ME, Dougherty MK, McGill SK,

- 503 Gulati AS, Dorrestein PC, Baker ES, Redinbo MR, Barrangou R, Theriot CM.  
504 2023. Bile salt hydrolases shape the bile acid landscape and restrict  
505 *Clostridioides difficile* growth in the murine gut. *Nat Microbiol* 8:611–628.
- 506 14. L. JM, L. LJ, B. YV, D. SP. 2017. *Clostridium difficile* Colonizes Alternative  
507 Nutrient Niches during Infection across Distinct Murine Gut Microbiomes.  
508 *mSystems* 2:10.1128/msystems.00063-17.
- 509 15. Zheng D, Liwinski T, Elinav E. 2020. Interaction between microbiota and immunity  
510 in health and disease. *Cell Res* 30:492–506.
- 511 16. Steiner TS, Flores CA, Pizarro TT, Guerrant RL. 1997. Fecal lactoferrin,  
512 interleukin-1beta, and interleukin-8 are elevated in patients with severe  
513 *Clostridium difficile* colitis. *Clin Diagn Lab Immunol* 4:719–722.
- 514 17. Jiang Z-D, DuPont HL, Garey K, Price M, Graham G, Okhuysen P, Dao-Tran T,  
515 LaRocco M. 2006. A common polymorphism in the interleukin 8 gene promoter is  
516 associated with *Clostridium difficile* diarrhea. *Am J Gastroenterol* 101:1112–  
517 1116.
- 518 18. El Feghaly RE, Stauber JL, Deych E, Gonzalez C, Tarr PI, Haslam DB. 2013.  
519 Markers of intestinal inflammation, not bacterial burden, correlate with clinical  
520 outcomes in *Clostridium difficile* infection. *Clin Infect Dis* 2013/03/13. 56:1713–  
521 1721.
- 522 19. Saleh MM, Frisbee AL, Leslie JL, Buonomo EL, Cowardin CA, Ma JZ, Simpson  
523 ME, Scully KW, Abhyankar MM, Petri WA. 2019. Colitis-Induced Th17 Cells  
524 Increase the Risk for Severe Subsequent *Clostridium difficile* Infection. *Cell Host*  
525 *Microbe* 25:756-765.e5.

- 526 20. Buonomo EL, Cowardin CA, Wilson MG, Saleh MM, Pramoonjago P, Petri WAJ.  
527 2016. Microbiota-Regulated IL-25 Increases Eosinophil Number to Provide  
528 Protection during *Clostridium difficile* Infection. *Cell Rep* 16:432–443.
- 529 21. Cowardin CA, Buonomo EL, Saleh MM, Wilson MG, Burgess SL, Kuehne SA,  
530 Schwan C, Eichhoff AM, Koch-Nolte F, Lyras D. 2016. The binary toxin CDT  
531 enhances *Clostridium difficile* virulence by suppressing protective colonic  
532 eosinophilia. *Nat Microbiol* 1:1–10.
- 533 22. Frisbee AL, Saleh MM, Young MK, Leslie JL, Simpson ME, Abhyankar MM,  
534 Cowardin CA, Ma JZ, Pramoonjago P, Turner SD, Liou AP, Buonomo EL, Petri  
535 WA. 2019. IL-33 drives group 2 innate lymphoid cell-mediated protection during  
536 *Clostridium difficile* infection. *Nat Commun* 10:2712.
- 537 23. Moreau GB, Naz F, Petri WAJ. 2024. Fecal microbiota transplantation stimulates  
538 type 2 and tolerogenic immune responses in a mouse model. *Anaerobe*  
539 86:102841.
- 540 24. Wang Z, Hua W, Li C, Chang H, Liu R, Ni Y, Sun H, Li Y, Wang X, Hou M, Liu Y,  
541 Xu Z, Ji M. 2019. Protective Role of Fecal Microbiota Transplantation on Colitis  
542 and Colitis-Associated Colon Cancer in Mice Is Associated With Treg Cells. *Front*  
543 *Microbiol* 10:2498.
- 544 25. Burrello C, Garavaglia F, Cribiù FM, Ercoli G, Lopez G, Troisi J, Colucci A,  
545 Guglietta S, Carloni S, Guglielmetti S, Taverniti V, Nizzoli G, Bosari S, Caprioli F,  
546 Rescigno M, Facciotti F. 2018. Therapeutic faecal microbiota transplantation  
547 controls intestinal inflammation through IL10 secretion by immune cells. *Nat*  
548 *Commun* 9:5184.



- 549 26. Wei Y-L, Chen Y-Q, Gong H, Li N, Wu K-Q, Hu W, Wang B, Liu K-J, Wen L-Z,  
550 Xiao X, Chen D-F. 2018. Fecal Microbiota Transplantation Ameliorates  
551 Experimentally Induced Colitis in Mice by Upregulating AhR. *Front Microbiol*  
552 9:1921.
- 553 27. Konturek PC, Koziel J, Dieterich W, Haziri D, Wirtz S, Glowczyk I, Konturek K,  
554 Neurath MF, Zopf Y. 2016. Successful therapy of *Clostridium difficile* infection  
555 with fecal microbiota transplantation. *J Physiol Pharmacol an Off J Polish*  
556 *Physiol Soc* 67:859–866.
- 557 28. Monaghan T, Mullish BH, Patterson J, Wong GKS, Marchesi JR, Xu H, Jilani T,  
558 Kao D. 2019. Effective fecal microbiota transplantation for recurrent *Clostridioides*  
559 *difficile* infection in humans is associated with increased signalling in the bile acid-  
560 farnesoid X receptor-fibroblast growth factor pathway. *Gut Microbes* 10:142–148.
- 561 29. Monaghan TM, Seekatz AM, Markham NO, Yau TO, Hatzia Apostolou M, Jilani T,  
562 Christodoulou N, Roach B, Birli E, Pomenya O, Louie T, Lacy DB, Kim P, Lee C,  
563 Kao D, Polytarchou C. 2021. Fecal Microbiota Transplantation for Recurrent  
564 *Clostridioides difficile* Infection Associates With Functional Alterations in  
565 Circulating microRNAs. *Gastroenterology* 161:255-270.e4.
- 566 30. Jan N, Hays RA, Oakland DN, Kumar P, Ramakrishnan G, Behm BW, Petri WA,  
567 Marie C. 2021. Fecal Microbiota Transplantation Increases Colonic IL-25 and  
568 Dampens Tissue Inflammation in Patients with Recurrent *Clostridioides difficile*.  
569 *mSphere* 6:10.1128/msphere.00669-21.
- 570 31. Andrews S. 2010. FastQC: a quality control tool for high throughput sequence  
571 data. Babraham Bioinformatics, Babraham Institute, Cambridge, United Kingdom.

- 572 32. Ewels P, Magnusson M, Lundin S, Källér M. 2016. MultiQC: summarize analysis  
573 results for multiple tools and samples in a single report. *Bioinformatics* 32:3047–  
574 3048.
- 575 33. Bray NL, Pimentel H, Melsted P, Pachter L. 2016. Near-optimal probabilistic RNA-  
576 seq quantification. *Nat Biotechnol* 34:525–527.
- 577 34. R Core Team. 2020. R: A language and environment for statistical computing.
- 578 35. Sonesson C, Love MI, Robinson MD. 2015. Differential analyses for RNA-seq:  
579 transcript-level estimates improve gene-level inferences. *F1000Research* 4.
- 580 36. Love MI, Huber W, Anders S. 2014. Moderated estimation of fold change and  
581 dispersion for RNA-seq data with DESeq2. *Genome Biol* 15:550.
- 582 37. Korotkevich G, Sukhov V, Budin N, Shpak B, Artyomov MN, Sergushichev A.  
583 2021. Fast gene set enrichment analysis. *bioRxiv* 060012.
- 584 38. Liberzon A, Birger C, Thorvaldsdóttir H, Ghandi M, Mesirov JP, Tamayo P. 2015.  
585 The Molecular Signatures Database Hallmark Gene Set Collection. *Cell Syst*  
586 1:417–425.
- 587 39. Ashburner M, Ball CA, Blake JA, Botstein D, Butler H, Cherry JM, Davis AP,  
588 Dolinski K, Dwight SS, Eppig JT, Harris MA, Hill DP, Issel-Tarver L, Kasarskis A,  
589 Lewis S, Matese JC, Richardson JE, Ringwald M, Rubin GM, Sherlock G. 2000.  
590 Gene Ontology: tool for the unification of biology. *Nat Genet* 25:25–29.
- 591 40. Kanehisa M, Goto S. 2000. KEGG: kyoto encyclopedia of genes and genomes.  
592 *Nucleic Acids Res* 28:27–30.
- 593 41. Wickham H, Averick M, Bryan J, Chang W, McGowan LD, François R, Golemund  
594 G, Hayes A, Henry L, Hester J. 2019. Welcome to the Tidyverse. *J open source*

595           Softw 4:1686.

596 42. Song D, Lian Y, Zhang L. 2023. The potential of activator protein 1 (AP-1) in  
597 cancer targeted therapy. *Front Immunol* 14.

598 43. Vallejo A, Perurena N, Guruceaga E, Mazur PK, Martinez-Canarias S, Zandueta  
599 C, Valencia K, Arricibita A, Gwinn D, Sayles LC, Chuang C-H, Guembe L, Bailey  
600 P, Chang DK, Biankin A, Ponz-Sarvise M, Andersen JB, Khatri P, Bozec A,  
601 Sweet-Cordero EA, Sage J, Lecanda F, Vicent S. 2017. An integrative approach  
602 unveils FOSL1 as an oncogene vulnerability in KRAS-driven lung and pancreatic  
603 cancer. *Nat Commun* 8:14294.

604 44. Ramar V, Guo S, Hudson B, Khedri A, Guo AA, Li J, Liu M. 2024. Interaction of  
605 NF- $\kappa$ B and FOSL1 drives glioma stemness. *Cell Mol Life Sci* 81:255.

606 45. Li H, Zhong A, Li S, Meng X, Wang X, Xu F, Lai M. 2017. The integrated pathway  
607 of TGF $\beta$ /Snail with TNF $\alpha$ /NF $\kappa$ B may facilitate the tumor-stroma interaction in the  
608 EMT process and colorectal cancer prognosis. *Sci Rep* 7:4915.

609 46. Tümer E, Bröer A, Balkrishna S, Jülich T, Bröer S. 2013. Enterocyte-specific  
610 Regulation of the Apical Nutrient Transporter SLC6A19 (B<sup>0</sup>AT1) by Transcriptional  
611 and Epigenetic Networks \* . *J Biol Chem* 288:33813–33823.

612 47. Javed K, Bröer S. 2019. Mice Lacking the Intestinal and Renal Neutral Amino  
613 Acid Transporter SLC6A19 Demonstrate the Relationship between Dietary  
614 Protein Intake and Amino Acid Malabsorption. *Nutrients*.

615 48. Mardjuki R, Wang S, Carozza J, Zirak B, Subramanyam V, Abhiraman G, Lyu X,  
616 Goodarzi H, Li L. 2024. Identification of the extracellular membrane protein  
617 ENPP3 as a major cGAMP hydrolase and innate immune checkpoint. *Cell Rep*

- 618 43.
- 619 49. Dong Z, Zhu C, Zhan Q, Jiang W. 2017. The roles of RRP15 in nucleolar  
620 formation, ribosome biogenesis and checkpoint control in human cells.  
621 *Oncotarget* 8:13240–13252.
- 622 50. Gan Y, Deng J, Hao Q, Huang Y, Han T, Xu J-G, Zhao M, Yao L, Xu Y, Xiong J,  
623 Lu H, Wang C, Chen J, Zhou X. 2023. UTP11 deficiency suppresses cancer  
624 development via nucleolar stress and ferroptosis. *Redox Biol* 62:102705.
- 625 51. Sha Z, Zhou J, Wu Y, Zhang T, Li C, Meng Q, Musunuru PP, You F, Wu Y, Yu R,  
626 Gao S. 2020. BYSL Promotes Glioblastoma Cell Migration, Invasion, and  
627 Mesenchymal Transition Through the GSK-3 $\beta$ / $\beta$ -Catenin Signaling Pathway.  
628 *Front Oncol* 10.
- 629 52. Gabut M, Bourdelais F, Durand S. 2020. Ribosome and Translational Control in  
630 Stem Cells. *Cells*.
- 631 53. Elhamamsy AR, Metge BJ, Alsheikh HA, Shevde LA, Samant RS. 2022.  
632 Ribosome Biogenesis: A Central Player in Cancer Metastasis and Therapeutic  
633 Resistance. *Cancer Res* 82:2344–2353.
- 634 54. Destefanis F, Manara V, Bellosta P. 2020. Myc as a Regulator of Ribosome  
635 Biogenesis and Cell Competition: A Link to Cancer. *Int J Mol Sci*.
- 636 55. Jiao L, Liu Y, Yu X-Y, Pan X, Zhang Y, Tu J, Song Y-H, Li Y. 2023. Ribosome  
637 biogenesis in disease: new players and therapeutic targets. *Signal Transduct*  
638 *Target Ther* 8:15.
- 639 56. Narayanan S, Cai C-Y, Assaraf YG, Guo H-Q, Cui Q, Wei L, Huang J-J, Ashby  
640 CR, Chen Z-S. 2020. Targeting the ubiquitin-proteasome pathway to overcome

- 641 anti-cancer drug resistance. *Drug Resist Updat* 48:100663.
- 642 57. Moreau B. 2013. Characterization of Francisella-Scavenger Receptor Interactions  
643 and Contributions to Host Signaling Qualifying Exam.
- 644 58. Schoeler M, Caesar R. 2019. Dietary lipids, gut microbiota and lipid metabolism.  
645 *Rev Endocr Metab Disord* 20:461–472.
- 646 59. Canfora EE, Jocken JW, Blaak EE. 2015. Short-chain fatty acids in control of  
647 body weight and insulin sensitivity. *Nat Rev Endocrinol* 11:577–591.
- 648 60. Begley M, Gahan CGM, Hill C. 2005. The interaction between bacteria and bile.  
649 *FEMS Microbiol Rev* 29:625–651.
- 650 61. Vrieze A, Out C, Fuentes S, Jonker L, Reuling I, Kootte RS, van Nood E,  
651 Holleman F, Knaapen M, Romijn JA, Soeters MR, Blaak EE, Dallinga-Thie GM,  
652 Reijnders D, Ackermans MT, Serlie MJ, Knop FK, Holst JJ, van der Ley C, Kema  
653 IP, Zoetendal EG, de Vos WM, Hoekstra JBL, Stroes ES, Groen AK, Nieuwdorp  
654 M. 2014. Impact of oral vancomycin on gut microbiota, bile acid metabolism, and  
655 insulin sensitivity. *J Hepatol* 60:824–831.
- 656 62. Suez J, Zmora N, Zilberman-Schapira G, Mor U, Dori-Bachash M, Bashiardes S,  
657 Zur M, Regev-Lehavi D, Ben-Zeev Brik R, Federici S, Horn M, Cohen Y, Moor AE,  
658 Zeevi D, Korem T, Kotler E, Harmelin A, Itzkovitz S, Maharshak N, Shibolet O,  
659 Pevsner-Fischer M, Shapiro H, Sharon I, Halpern Z, Segal E, Elinav E. 2018.  
660 Post-Antibiotic Gut Mucosal Microbiome Reconstitution Is Impaired by Probiotics  
661 and Improved by Autologous FMT. *Cell* 174:1406-1423.e16.
- 662 63. Ternet C, Kiel C. 2021. Signaling pathways in intestinal homeostasis and  
663 colorectal cancer: KRAS at centre stage. *Cell Commun Signal* 19:31.

- 664 64. Jeffery V, Goldson AJ, Dainty JR, Chieppa M, Sobolewski A. 2017. IL-6 Signaling  
665 Regulates Small Intestinal Crypt Homeostasis. *J Immunol* 199:304–311.
- 666 65. Li C, Zhou Y, Rychahou P, Weiss HL, Lee EY, Perry CL, Barrett TA, Wang Q,  
667 Evers BM. 2020. SIRT2 Contributes to the Regulation of Intestinal Cell  
668 Proliferation and Differentiation. *Cell Mol Gastroenterol Hepatol* 10:43–57.
- 669 66. Littmann ER, Lee J-J, Denny JE, Alam Z, Maslanka JR, Zarin I, Matsuda R,  
670 Carter RA, Susac B, Saffern MS, Fett B, Mattei LM, Bittinger K, Abt MC. 2021.  
671 Host immunity modulates the efficacy of microbiota transplantation for treatment  
672 of *Clostridioides difficile* infection. *Nat Commun* 12:755.
- 673 67. Yan J, Racaud-Sultan C, Pezier T, Edir A, Rolland C, Claverie C, Burlaud-Gaillard  
674 J, Olivier M, Velge P, Lacroix-Lamandé S, Vergnolle N, Wiedemann A. 2024.  
675 Intestinal organoids to model *Salmonella* infection and its impact on progenitors.  
676 *Sci Rep* 14:15160.
- 677 68. Batman PA, Kapembwa MS, Belmonte L, Tudor G, Kotler DP, Potten CS, Booth  
678 C, Cahn P, Griffin GE. 2014. HIV enteropathy: HAART reduces HIV-induced stem  
679 cell hyperproliferation and crypt hypertrophy to normal in jejunal mucosa. *J Clin*  
680 *Pathol* 67:14–18.
- 681 69. Muncan V, Sansom OJ, Tertoolen L, Phesse TJ, Begthel H, Sancho E, Cole AM,  
682 Gregorieff A, de Alboran IM, Clevers H, Clarke AR. 2006. Rapid Loss of Intestinal  
683 Crypts upon Conditional Deletion of the Wnt/Tcf-4 Target Gene *c-Myc*. *Mol Cell*  
684 *Biol* 26:8418–8426.
- 685 70. Dörner K, Badertscher L, Horváth B, Hollandi R, Molnár C, Fuhrer T, Meier R,  
686 Sárázová M, van den Heuvel J, Zamboni N, Horvath P, Kutay U. 2022. Genome-

687 wide RNAi screen identifies novel players in human 60S subunit biogenesis  
688 including key enzymes of polyamine metabolism. *Nucleic Acids Res* 50:2872–  
689 2888.

690 71. Rao JN, Xiao L, Wang J-Y. 2020. Polyamines in Gut Epithelial Renewal and  
691 Barrier Function. *Physiology (Bethesda)* 35:328–337.

692 72. Stefani C, Miricescu D, Stanescu-Spinu I-I, Nica RI, Greabu M, Totan AR, Jinga  
693 M. 2021. Growth Factors, PI3K/AKT/mTOR and MAPK Signaling Pathways in  
694 Colorectal Cancer Pathogenesis: Where Are We Now? *Int J Mol Sci*.

695 73. Ahmadi SE, Rahimi S, Zarandi B, Chegeni R, Safa M. 2021. MYC: a multipurpose  
696 oncogene with prognostic and therapeutic implications in blood malignancies. *J*  
697 *Hematol Oncol* 14:121.

698 74. Ganai-Vonarburg SC, Duerr CU. 2020. The interaction of intestinal microbiota and  
699 innate lymphoid cells in health and disease throughout life. *Immunology* 159:39–  
700 51.

701 75. Jashim UM, Brandon T, L. LJ, Casey F, Katia S, Pankaj K, A. PW. 2024.  
702 Investigating the impact of antibiotic-induced dysbiosis on protection from  
703 *Clostridium difficile* colitis by mouse colonic innate lymphoid cells. *MBio*  
704 15:e03338-23.

705 76. Hodzic Z, Schill EM, Bolock AM, Good M. 2017. IL-33 and the intestine: The  
706 good, the bad, and the inflammatory. *Cytokine* 100:1–10.

707 77. Dai X, Shiraishi K, Muto J, Mori H, Murakami M, Sayama K. 2023. Nuclear IL-33  
708 Plays an Important Role in EGFR-Mediated Keratinocyte Migration by Regulating  
709 the Activation of Signal Transducer and Activator of Transcription 3 and NF-κB.

- 710 JID Innov 3:100205.
- 711 78. Andersson P, Yang Y, Hosaka K, Zhang Y, Fischer C, Braun H, Liu S, Yu G, Liu  
712 S, Beyaert R, Chang M, Li Q, Cao Y. 2018. Molecular mechanisms of IL-33-  
713 mediated stromal interactions in cancer metastasis. JCI insight 3.
- 714 79. Marconi GD, Fonticoli L, Rajan TS, Pierdomenico SD, Trubiani O, Pizzicannella J,  
715 Diomede F. 2021. Epithelial-Mesenchymal Transition (EMT): The Type-2 EMT in  
716 Wound Healing, Tissue Regeneration and Organ Fibrosis. Cells.
- 717 80. Fanjul-Fernández M, Folgueras AR, Cabrera S, López-Otín C. 2010. Matrix  
718 metalloproteinases: Evolution, gene regulation and functional analysis in mouse  
719 models. Biochim Biophys Acta - Mol Cell Res 1803:3–19.
- 720 81. Wang K, Zheng J, Yu J, Wu Y, Guo J, Xu Z, Sun X. 2020. Knockdown of MMP-1  
721 inhibits the progression of colorectal cancer by suppressing the PI3K/Akt/c-myc  
722 signaling pathway and EMT. Oncol Rep 43:1103–1112.
- 723
- 724



Table 1: Clinical Characteristics of the FMT Cohort

| <b>Clinical Characteristic</b>                                        |                           | <b>FMT Cohort (n=16)*</b> |
|-----------------------------------------------------------------------|---------------------------|---------------------------|
| Mean age at FMT                                                       |                           | 65 (12.1)                 |
| Number male gender                                                    |                           | 6 (37.5%)                 |
| Number white ethnicity                                                |                           | 16 (100%)                 |
| Mean BMI at FMT                                                       |                           | 29.9 (6.1)                |
| Mean number of CDI recurrences prior to FMT                           |                           | 3.8 (1.1)                 |
| Number of patients with:                                              | 2 recurrences             | 1 (6.25%)                 |
|                                                                       | 3 recurrences             | 6 (37.5%)                 |
|                                                                       | 4 recurrences             | 6 (37.5%)                 |
|                                                                       | 5 recurrences             | 1 (6.25%)                 |
|                                                                       | 6 recurrences             | 2 (12.5%)                 |
| Number patients treated with vancomycin prior to FMT                  |                           | 16 (100%)                 |
| Number of patients with IBD                                           |                           | 1 (6.25%)                 |
| Number of patients with IBD Subtypes                                  | <i>Crohn's Disease</i>    | 1 (6.25%)                 |
|                                                                       | <i>Ulcerative Colitis</i> | 0 (0.0%)                  |
| FMT Success Rate (No recurrences within 60 day follow-up)             |                           | 16 (100%)                 |
| Number of patients with current or prior antibiotic use at follow-up. |                           | 0 (0.0%)                  |

\*Represents Mean (Standard Deviation) or Total Number (Percentage)

Figure 1: FMT drives changes in host transcriptional profiles.

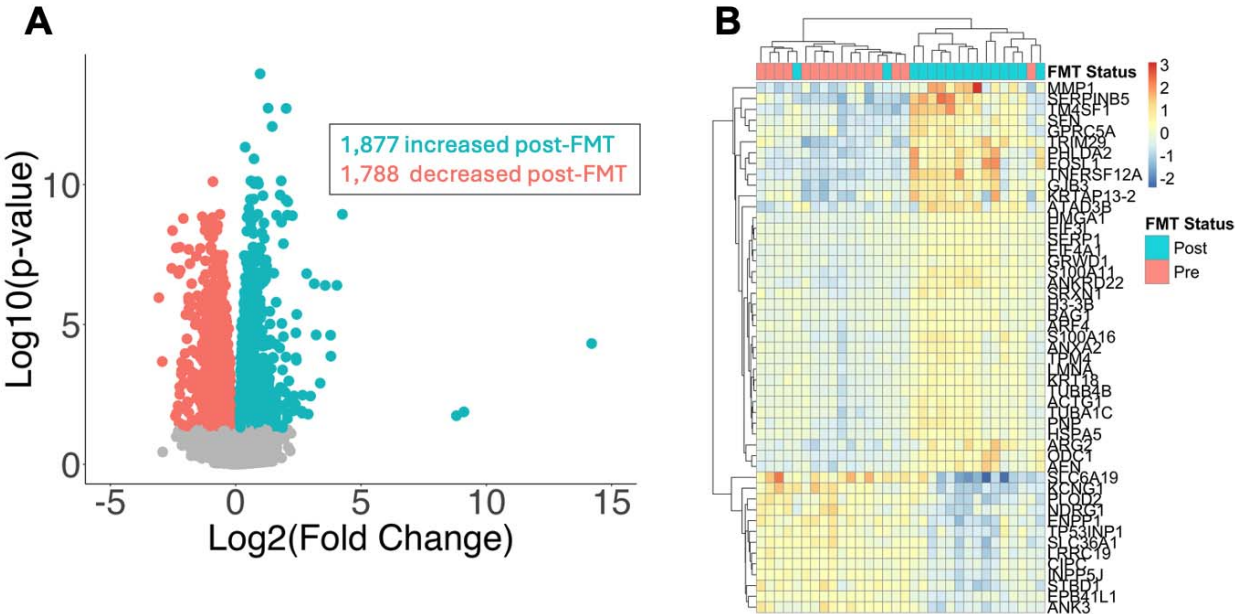

Figure 2: Gene sets associated with ribosome/protein synthesis and lipid metabolism are altered by FMT.

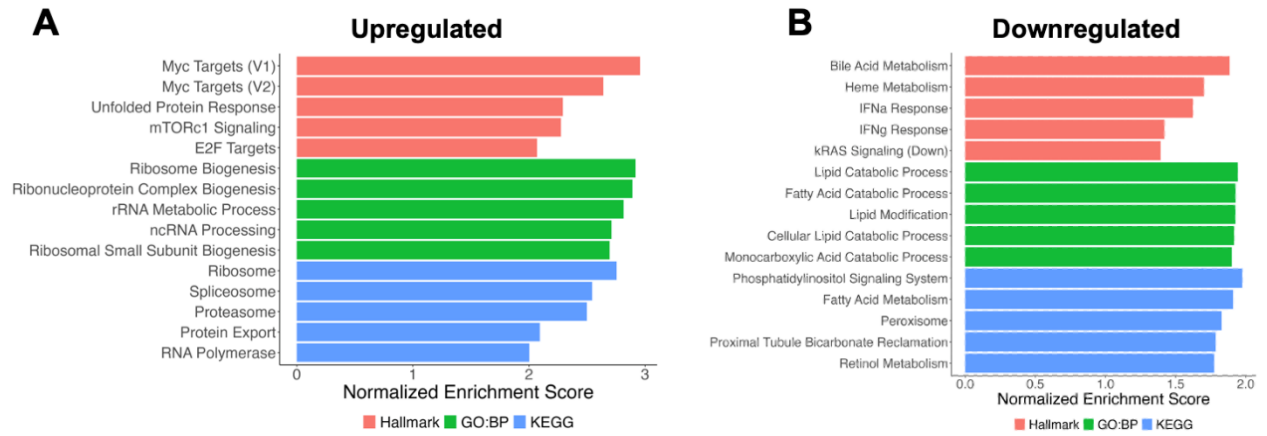

Figure 3: FMT promotes increased colonic crypt length.

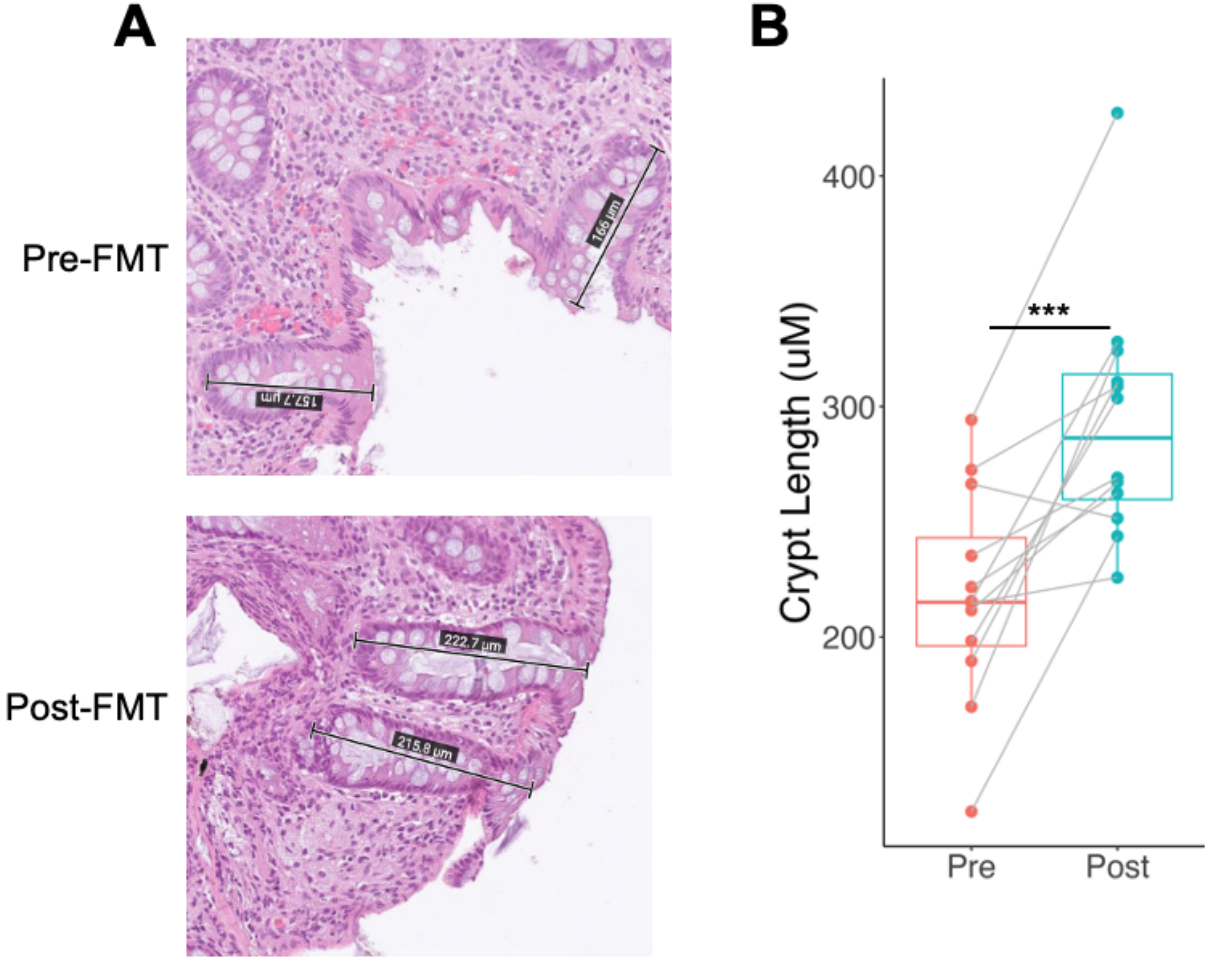

Figure 4: Crypt length is correlated with Myc and mTORc1 target genes.

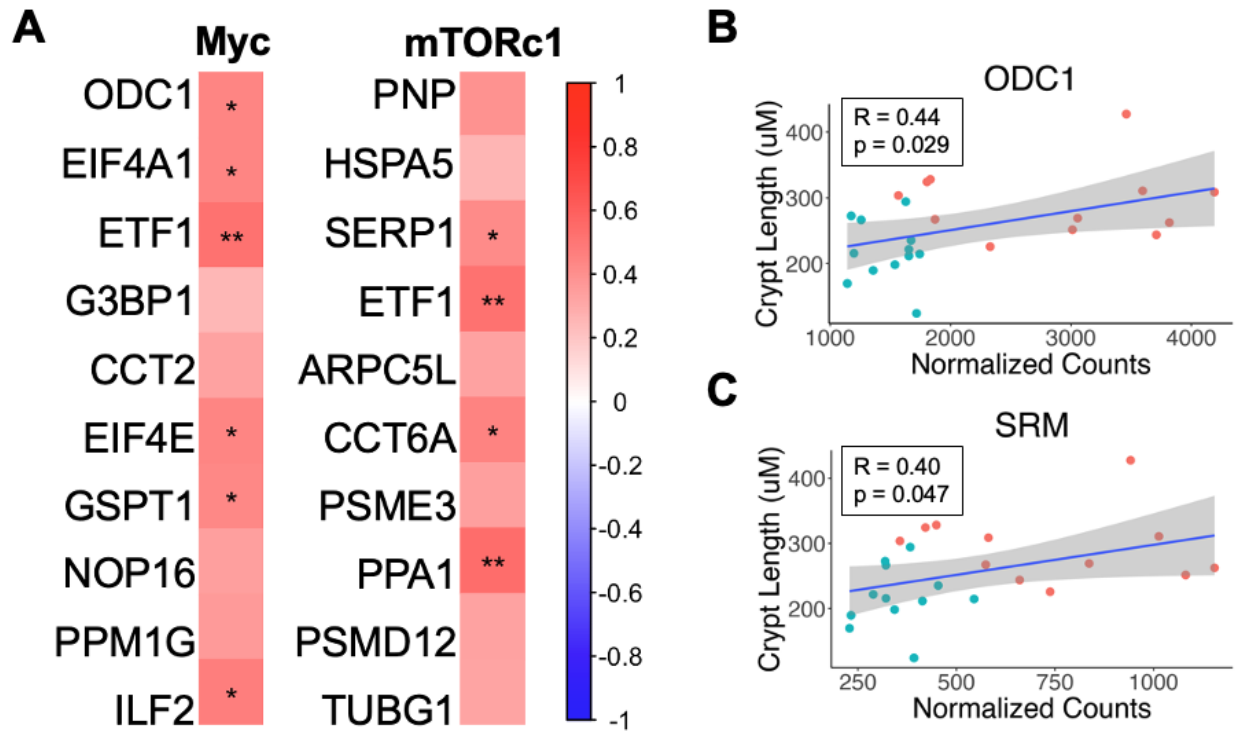

Figure 5: FMT promotes expression of IL-33 signaling, EGFR ligand, and tissue remodeling genes.

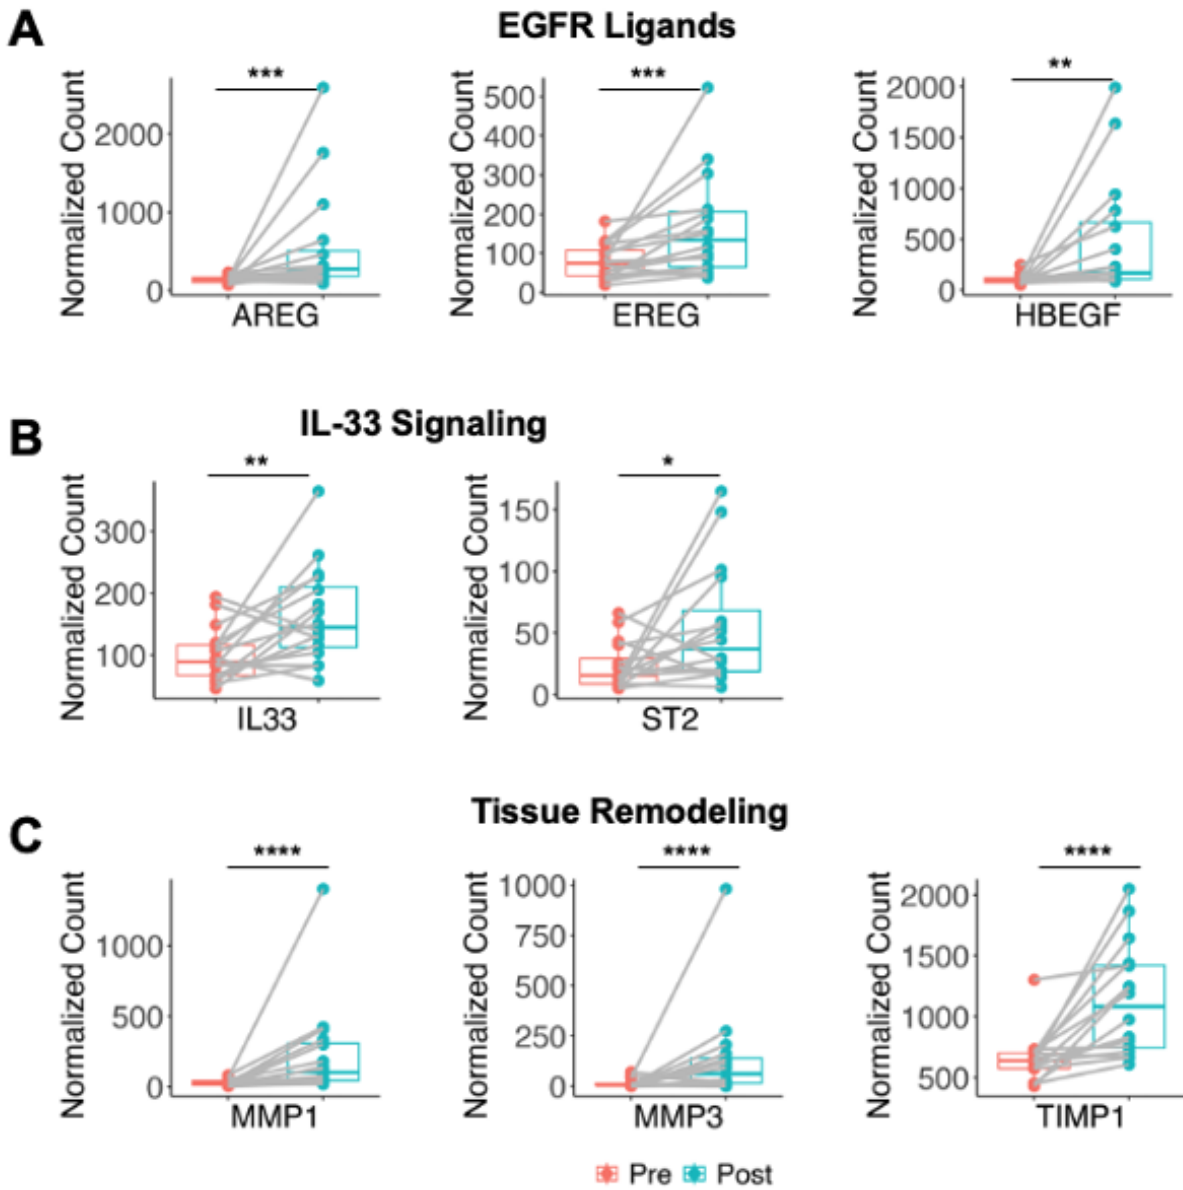

Figure 6: Visual summary of FMT-promoted changes in colonic gene expression.

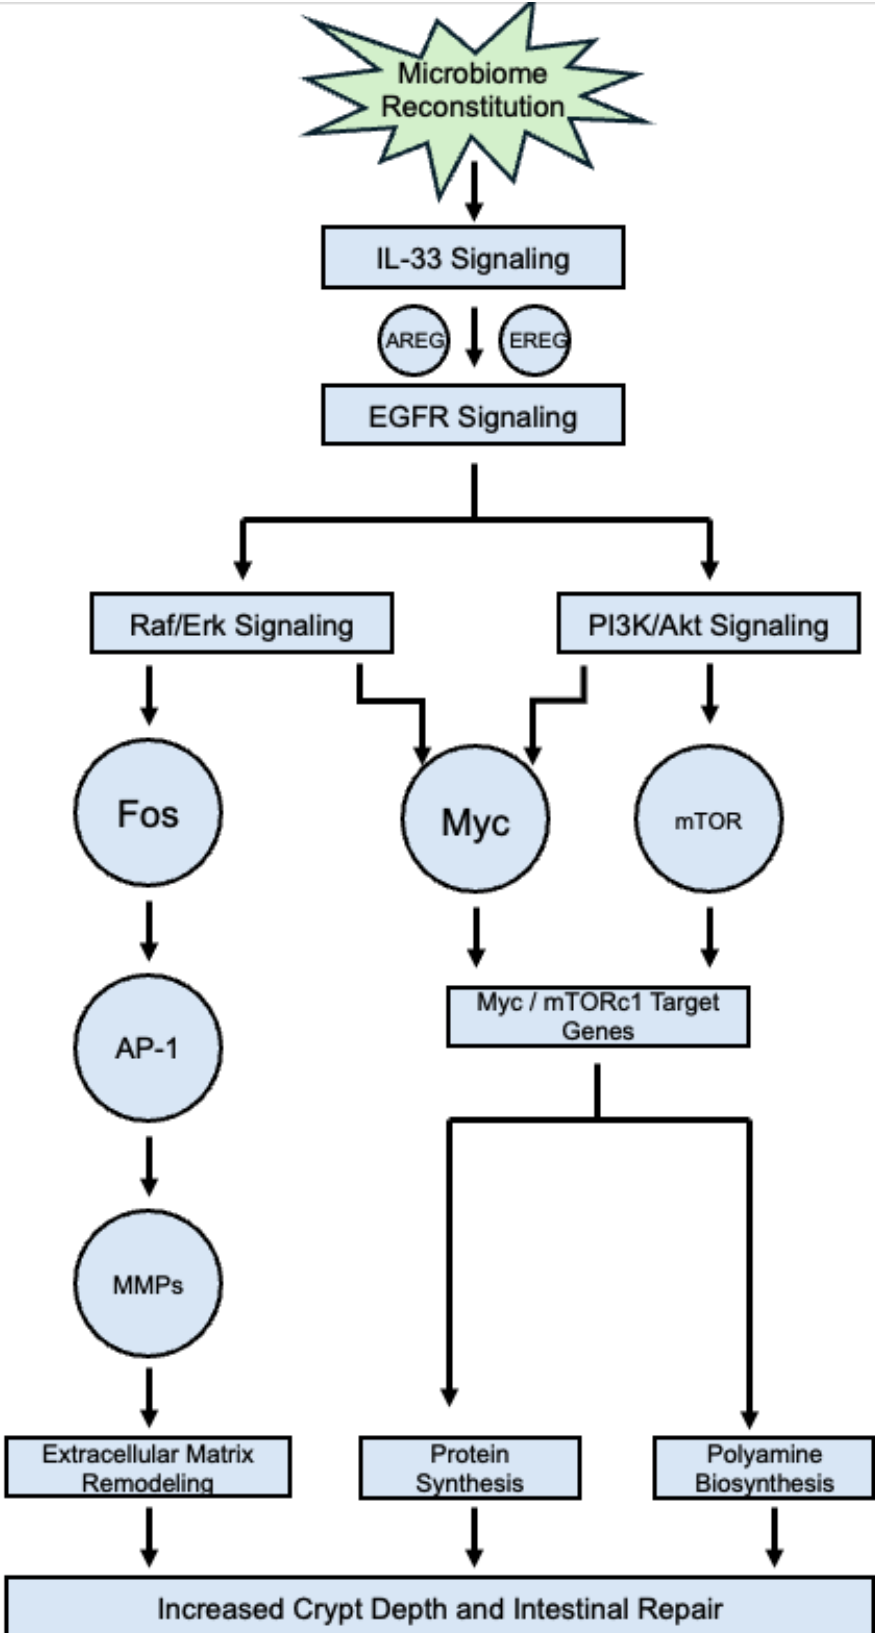

Source: https://medrxiv.org/content/10.1101/2024.11.28.24318101v1.full.pdf
